# Supplementary material
Source: publisher site journal article supplement (https://www.spandidos-publications.com/7009/downloadSupplementary)
Supplement: Supplementary file 1 [file downloadSupplementary]

## Sheet: Sheet1
Table SII. Clinical information of patients included in the reverse transcription-quantitative PCR analysis.
Sample number	Age	Sex	Tumor location	T	N	M	Stage
1	56	Female	Ascending colon	T3	N2a	M0	IIIB
2	55	Female	Rectum	T3	N2b	M0	IIIC
3	66	Female	Sigmoid colon	T2	N0	M0	I
4	74	Female	Ascending colon	T4a	N0	M0	IIB
5	66	Female	Rectum	T3	N0	M0	IIA
6	61	Female	Sigmoid colon	T3	N0	M0	IIA
7	55	Female	Descending colon	T3	N0	M0	IIA
8	77	Female	Descending colon	T2	N0	M0	I
9	82	Female	Descending colon	T3	N0	M0	IIA
10	67	Female	Rectum	T3	N1a	M0	IIIB
11	80	Female	Transverse colon	T3	N0	M0	IIA
12	65	Female	Transverse colon	T4a	N2b	M1a	IVA
13	63	Female	Rectum	T3	N0	M0	IIA
14	63	Female	Descending colon	T3	N2b	M0	IIIC
15	41	Male	Sigmoid colon	T3	N0	M0	IIA
16	79	Male	Ascending colon	T3	N2b	M0	IIIC
17	65	Male	Ascending colon	T2	N0	M0	I
18	55	Male	Rectum	T3	N0	M0	IIA
19	68	Male	Ascending colon	T2	N2a	M0	IIIB
20	48	Male	Transverse colon	T3	N2	M1a	IVA
21	59	Male	Descending colon	T4a	N1	M0	IIIB
22	45	Male	Descending colon	T3	N0	M0	IIA
23	79	Male	Sigmoid colon	T3	N2b	M0	IIIC
24	76	Male	Rectum	T3	N1	M1a	IVA
25	81	Male	Descending colon	T3	N1b	M1	IV
26	68	Male	Ascending colon	T4a	N1	M0	IIIB
27	64	Male	Sigmoid colon	T3	N2b	M0	IIIC
28	59	Male	Ascending colon	T3	N2	M0	IIIC
29	63	Male	Descending colon	T4	N2	M1a	IVA
30	53	Male	Sigmoid colon	T3	N0	M0	IIA
T, tumor; N, node; M, metastasis.
